# Supplementary material for: Room-temperature and ultrafast Eu3+ ion doping for highly luminescent and extremely small CaMoO4 nanocrystals
Source: Royal Society of Chemistry journal article supplement (doi:10.1039/d3dt00594a), 2023-01-01
Supplement: d3dt00594a1.pdf [file d3dt00594a1.pdf]

## Electronic Supplementary Information

### Room-temperature and ultra-fast Eu<sup>3+</sup> ion doping for highly luminescent and extremely small CaMoO<sub>4</sub> nanocrystals

Qiulin Cao, Mengxin Liu, Xinan Shi, Zhan Ni, Bo Li, Chengzeng Lu and Daocheng Pan\*

State Key Laboratory of Featured Metal Materials and Life-cycle Safety for Composite Structures, School of Resources, Environment and Materials, Guangxi University, Nanning 530004, China

\*Corresponding authors E-mail addresses: dcpan@gxu.edu.cn

#### Experimental Section

##### Chemicals

Calcium nitrate (99%) and ammonium molybdate ((NH<sub>4</sub>)<sub>6</sub>Mo<sub>7</sub>O<sub>24</sub>·4H<sub>2</sub>O, 99%) were purchased from Beijing Chemical works. Butyric acid (A.R.), butyl amine (A.R.) and ethanol (A.R.), europium nitrate hexahydrate (Eu(NO<sub>3</sub>)<sub>3</sub>·6H<sub>2</sub>O, 99.99%) were supplied by Aladdin Inc. Methanol (A.R.) and chloroform (A.R.) were bought by Chengdu Kelong Chemicals Ltd. All the initial chemicals in this work were used without further purification.

##### Room-temperature preparation of undoped CaMoO<sub>4</sub> nanoparticles

The synthesis of CaMoO<sub>4</sub> nanoparticles is as follows: 10.0 mmol of Ca(NO<sub>3</sub>)<sub>2</sub>, 120 ml of ethanol and 15 ml of butyric acid were added into a 250 ml of beaker. Next, under magnetic stirring, 10 ml of butylamine was slowly dropped into the beaker, forming a homogeneous and clear solution. Subsequently, 10 mmol of ammonium molybdate was dissolved into 40 ml of methanol and 10 ml of butylamine by ultrasound, forming a transparent solution. The two solutions are then mixed together at room temperature under magnetic stirring to form copious white precipitate. The white precipitate was collected by centrifugation and washed several times with ethanol. Finally, CaMoO<sub>4</sub> nanoparticles was dissolved in 100 ml of chloroform.

## **Room-temperature cation exchange for synthesis of Eu-doped CaMoO<sub>4</sub> nanoparticles**

For the synthesis of Eu-doped CaMoO<sub>4</sub> nanoparticles with an Eu/Ca feeding ratio of 1:1, 1.0 mmol of Eu(NO<sub>3</sub>)<sub>3</sub>, 1.0 ml of butyric acid and 1.0 ml of butylamine were added into a glass vial. The mixture was magnetically stirred on a hotplate at 100°C until all the solid was dissolved. The solution was cooled to the room temperature, and 3 ml of chloroform was added into the vial. Next, the Eu(NO<sub>3</sub>)<sub>3</sub> chloroform solution is swiftly injected into 10 ml of CaMoO<sub>4</sub> nanoparticle chloroform solution to form Eu-doped CaMoO<sub>4</sub> luminescent nanoparticles. During the cation exchange process, PL spectra and integrated PL intensity were *in-situ* recorded by using Ocean Optics USB2000+ spectrometer with a Y-type fiber optic probe and a 280 nm deep UV-LED as the excitation source. Finally, Eu-doped CaMoO<sub>4</sub> nanoparticles were precipitated by using methanol and redispersed in chloroform.

### **2.3 Characterizations**

The XRD patterns were measured by BRUKER AXS GMBH with Cu-K $\alpha$  target. The morphology and size of the samples were observed by transmission electron microscopy (TEM, FEI TECNAI G2 F30) at accelerating voltage of 300 kV. Photoluminescence (PL) spectra, photoluminescence excitation (PLE) spectra, PL lifetime and absolute photoluminescence quantum yields (PLQYs) were recorded on a Horiba Jobin Yvon Fluorolog-3 spectrometer and Edinburgh FLS-1000 spectrofluorometer. Thermogravimetric curve was measured on a TGA/DSC 1 STARE of Mettler-Toledo in air. I-V-L curves of LED were synchronously measured by Minolta LS-150 luminance meter and Keithley 2400 source meter. Fourier transform infrared spectroscopy (FT-IR) curve was obtained on a Bruker Vertex 70 FT-IR spectrophotometer. The valence states of elements were measured by X-ray photoelectron spectroscopy (XPS, Thermo-Fisher Scientific ESCALAB 250Xi). The chemical compositions were detected by BRUKER X-ray fluorescence spectrometer (S8 TIGER).

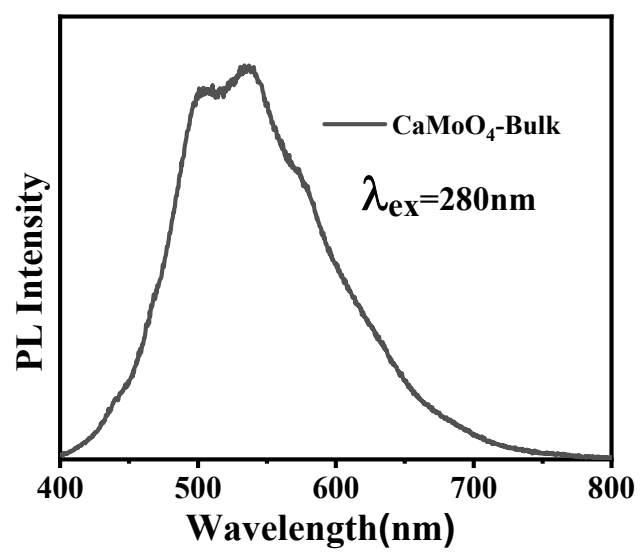

**Figure S1.** Defect emission spectrum of undoped bulk CaMoO<sub>4</sub> powder.

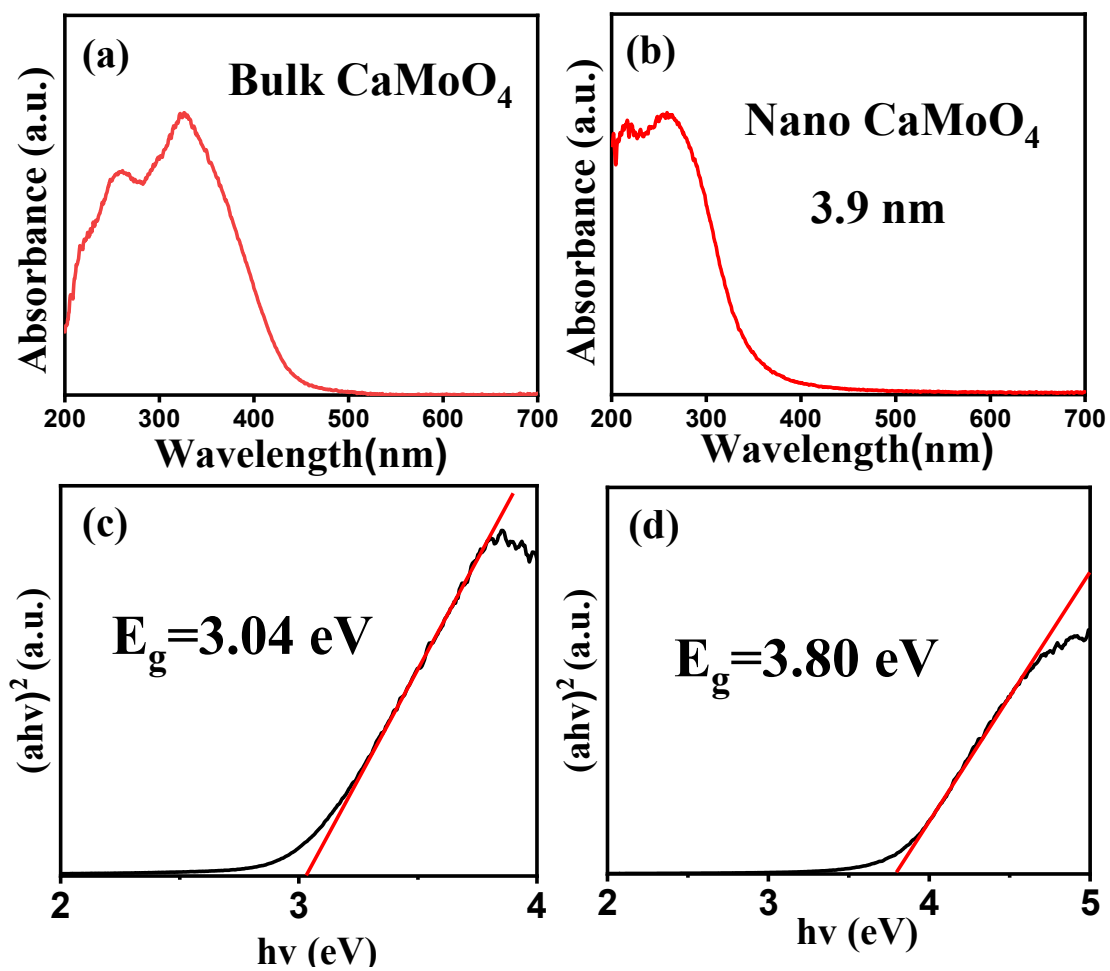

**Figure S2.** UV-vis diffuse reflectance spectra (a, b) and the optical band gaps (c, d) of bulk  $\text{CaMoO}_4$  powder (a, c) and the corresponding  $\text{CaMoO}_4$  nanocrystals (b, d).

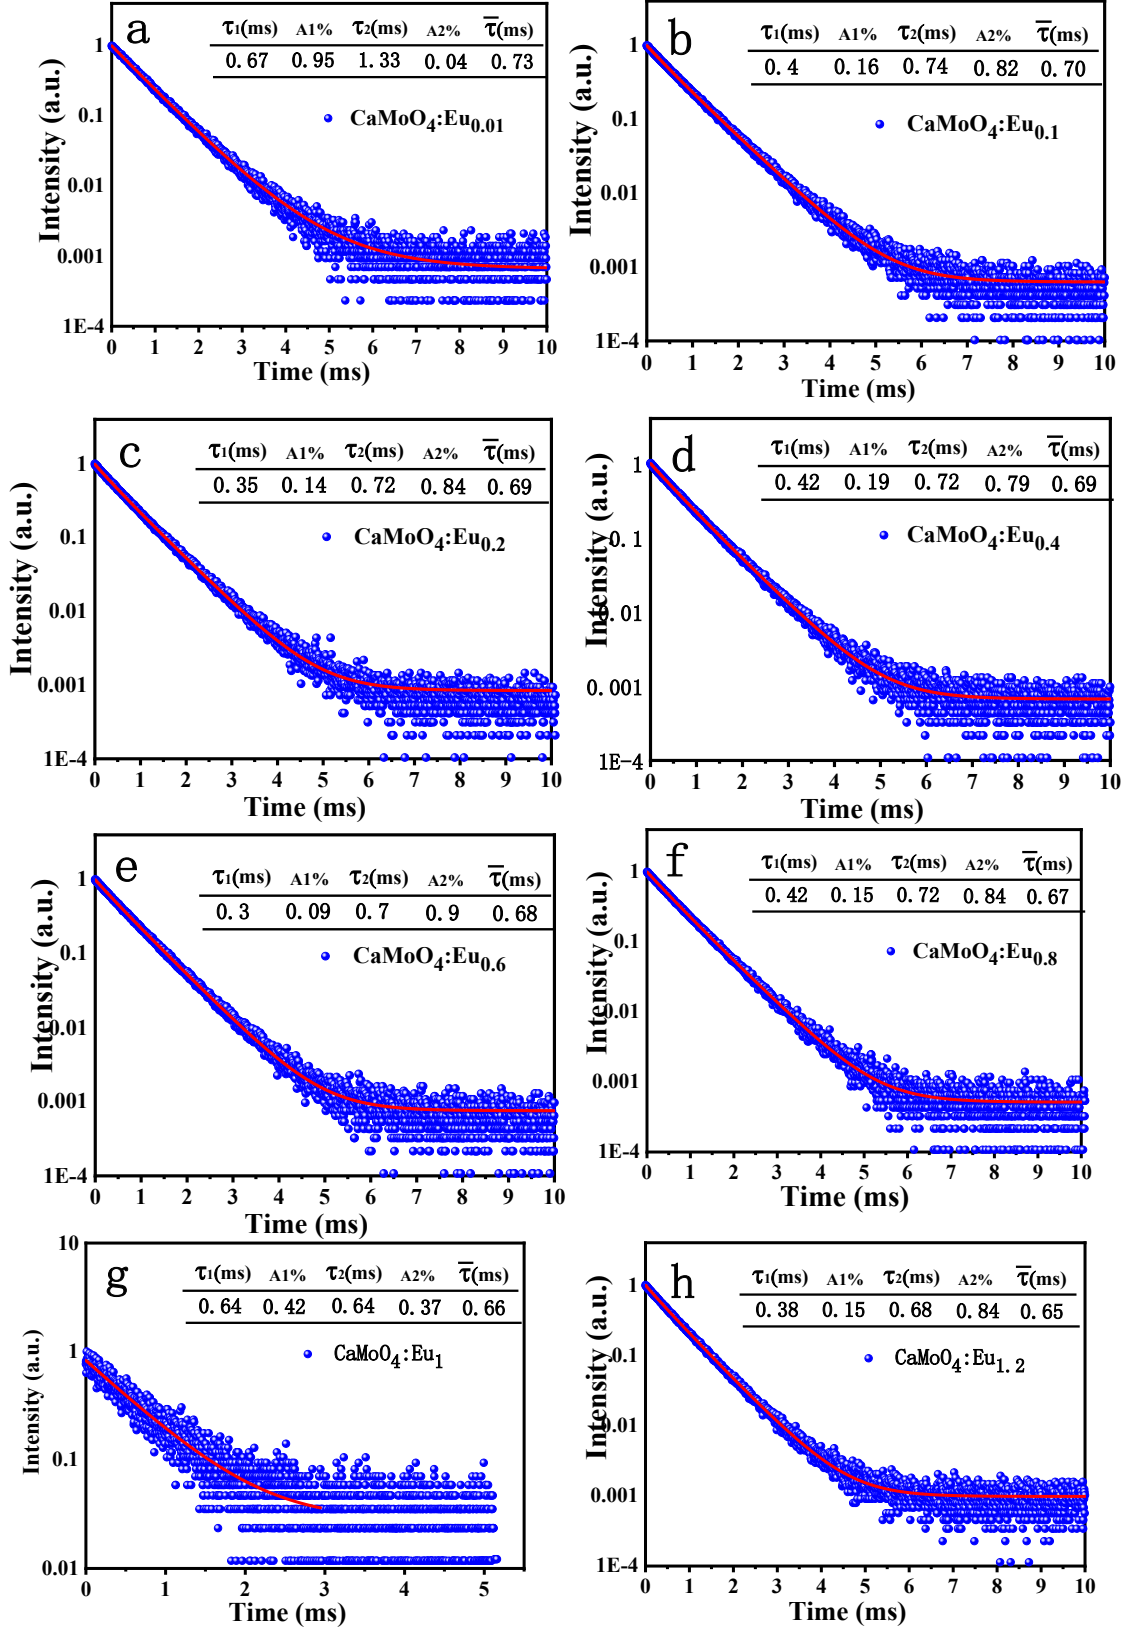

**Figure S3** PL decay curves of Eu-doped  $\text{CaMoO}_4$  nanoparticles with different  $\text{Eu}^{3+}$  feeding ratios ( $x = \text{Eu}/\text{Ca} = 0.01, 0.1, 0.2, 0.4, 0.6, 0.8, 1, 1.2$ ).

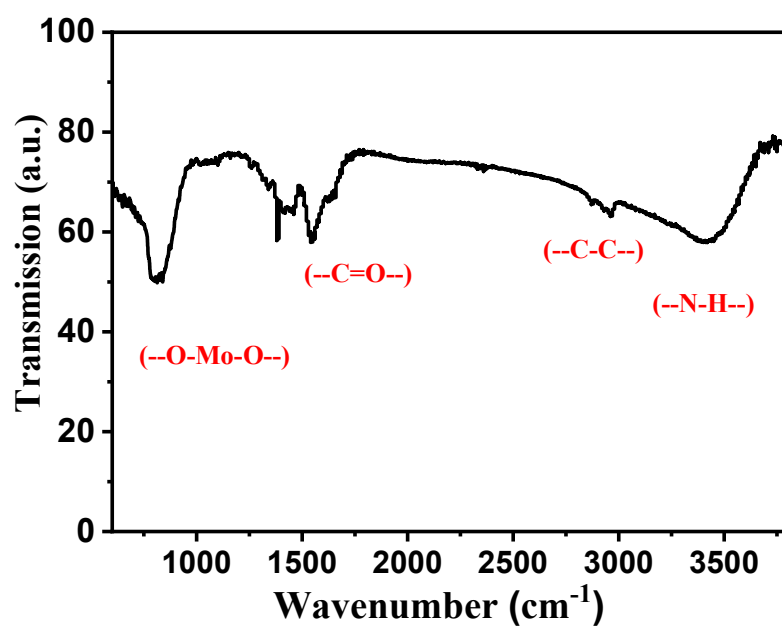

**Figure S4** FT-IR spectrum of butyric acid/butylamine-capped Eu-doped CaMoO<sub>4</sub> nanocrystals with Eu/Ca feeding ratio of 1:1.

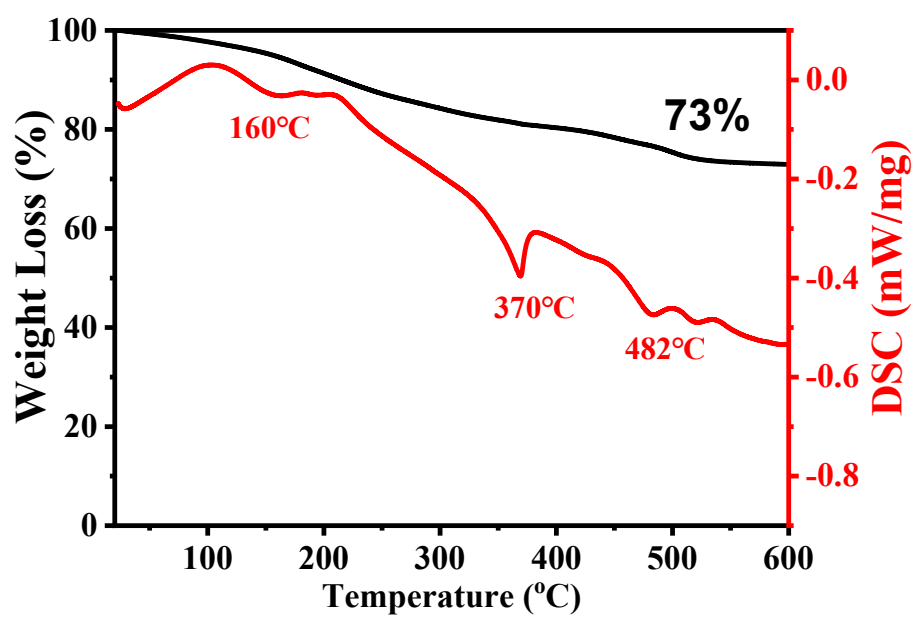

**Figure S5** TGA-DSC curves of butyric acid/butylamine-capped Eu-doped CaMoO<sub>4</sub> nanocrystals with Eu/Ca feeding ratio of 1:1.

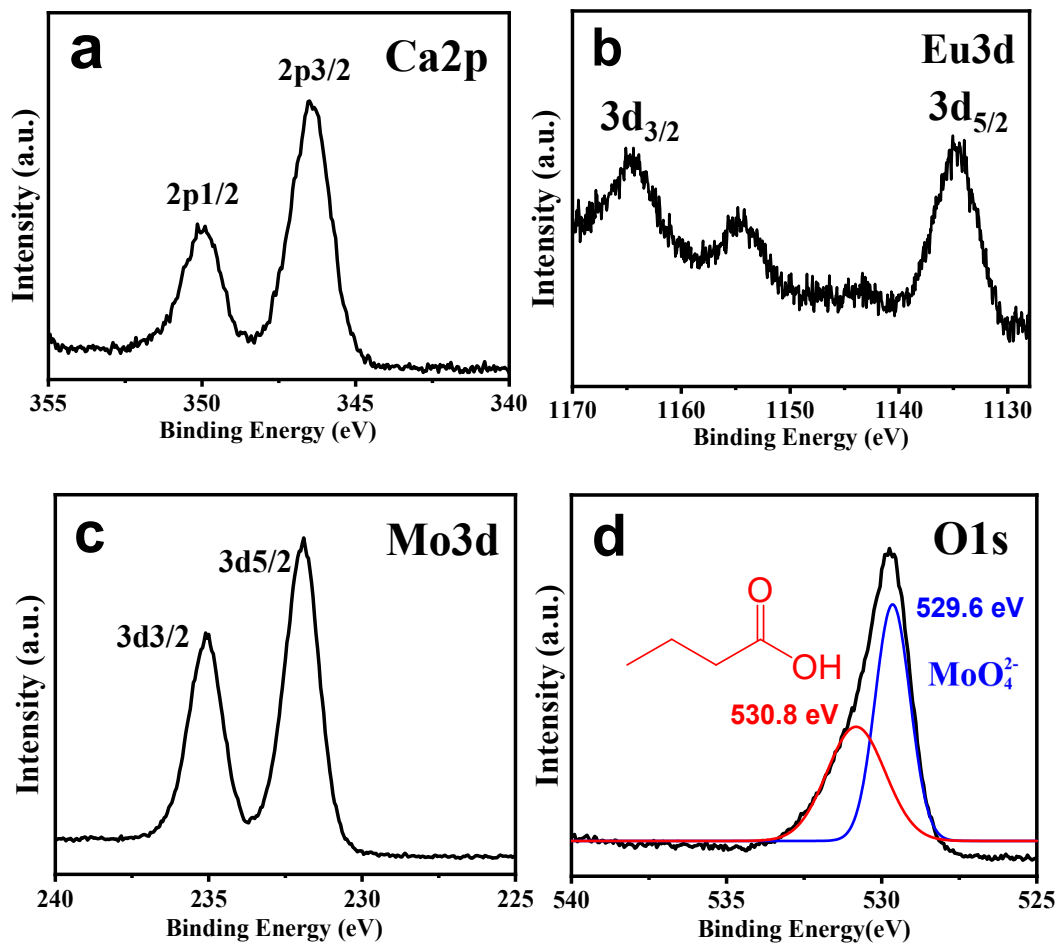

**Figure S6** XPS spectra of Eu-doped CaMoO<sub>4</sub> nanocrystals with Eu/Ca feeding ratio of 1:1. (a) Ca2p; (b) Eu3d; (c) Mo3d; (d) O1s.



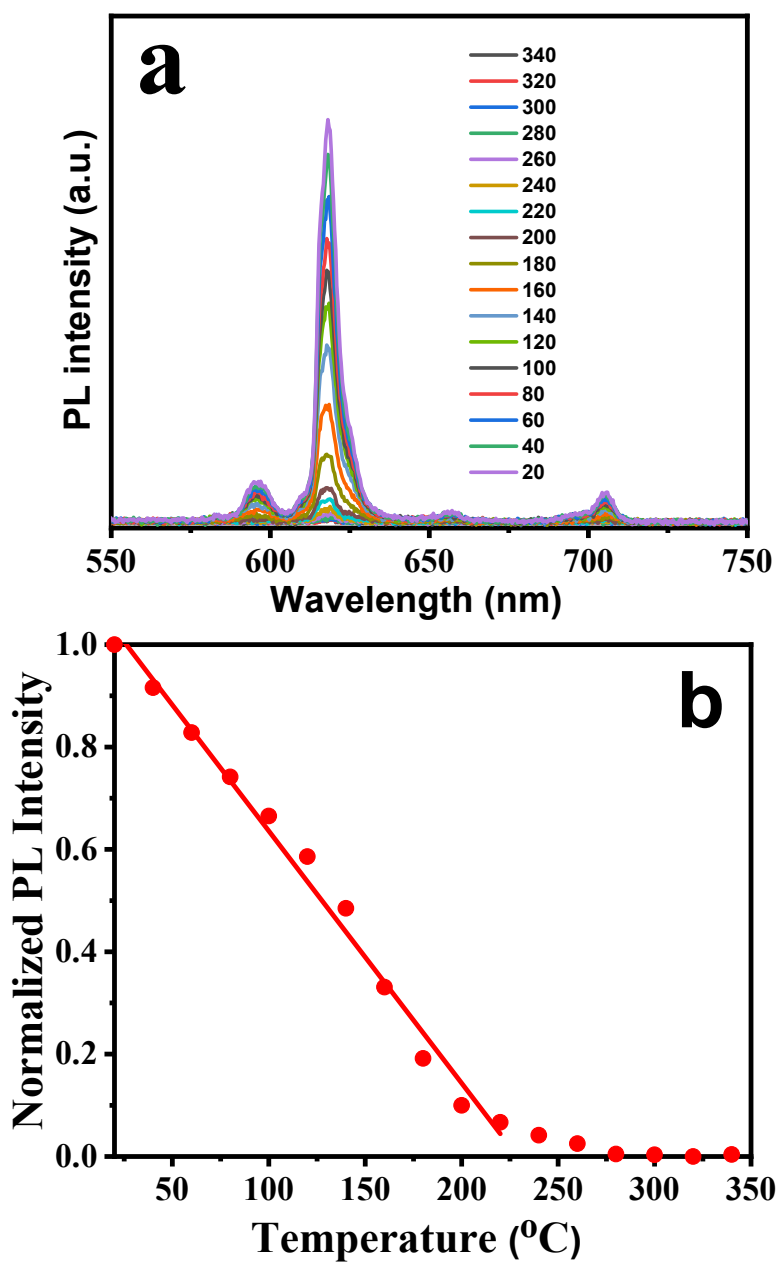

**Figure S7** (a) Temperature-dependent PL spectra of Eu-doped CaMoO<sub>4</sub> nanocrystals with Eu/Ca feeding ratio of 1:1. (b) the plot of PL intensity vs temperature for Eu-doped CaMoO<sub>4</sub> nanocrystals with Eu/Ca feeding ratio of 1:1.
